1 **Investigation of the pathogenic *RFC1* repeat expansion in a Canadian and a Brazilian**  
2 **ataxia cohort: identification of novel conformations**

3  
4  
5 Fulya Akçimen MSc<sup>1,2</sup>, Jay P. Ross<sup>1,2</sup>, Cynthia V. Bourassa MSc<sup>2</sup>, Calwing Liao<sup>1,2</sup>, Daniel  
6 Rochefort MSc<sup>2</sup>, Maria Thereza Drumond Gama MD PhD<sup>4</sup>, Marie-Josée Dicarie<sup>2</sup>, Orlando G.  
7 Barsottini MD PhD <sup>4</sup>, Bernard Brais MD PhD FRCP(C)<sup>1,2,3</sup>, José Luiz Pedrosa MD PhD <sup>4</sup>,  
8 Patrick A. Dion PhD<sup>2,3</sup>, Guy A. Rouleau MD PhD FRCP(C)<sup>1,2,3\*</sup>

9  
10 <sup>1</sup>Department of Human Genetics, McGill University, Montréal, QC, Canada;

11 <sup>2</sup>Montreal Neurological Institute and Hospital, McGill University, Montréal, QC, Canada;

12 <sup>3</sup>Department of Neurology and Neurosurgery, McGill University, Montréal, QC, Canada;

13 <sup>4</sup>Division of General Neurology and Ataxia Unit, Department of Neurology, Federal University  
14 of São Paulo (UNIFESP), São Paulo, Brazil.

15 **\*Corresponding author:** Guy A. Rouleau

16 Address: Montreal Neurological Institute and Hospital,

17 3801 University Street, Room 636,

18 Montréal, Québec, Canada H3A 2B4

19 Email: [guy.rouleau@mcgill.ca](mailto:guy.rouleau@mcgill.ca)

20 Phone: +1 (514) 398-6644

21

22 **Conflict of Interests:** All authors report no conflict of interests.

23

24 **Abstract**

25 A homozygous pentanucleotide expansion in the *RFC1* gene has been shown to be a common  
26 cause of late-onset ataxia. In the general population a total of four different repeat conformations  
27 have been observed: a wild type sequence AAAAG (11 repeats), and longer expansions of  
28 AAAAG, AAAGG and AAGGG sequences. However, in ataxia cases only the AAGGG  
29 expansion has been shown to be pathogenic. In this study, we assessed the prevalence and nature  
30 of *RFC1* repeat expansions in three adult-onset ataxia cohorts: Brazilian (n = 23) and Canadian  
31 (n = 26) cases that tested negative for other known ataxia mutations, as well as a cohort of  
32 randomly selected Canadian cases (n = 128) without regard to a genetic diagnosis. We identified  
33 the homozygous AAGGG pathogenic expansion in only one Brazilian family with two affected  
34 siblings, and in one Canadian case. The *RFC1* expansion may therefore not be a common cause  
35 of adult-onset ataxia in these populations. Interestingly we observed two new repeat motifs,  
36 AAGAG and AGAGG, which indicates the dynamic nature of the pentanucleotide expansion  
37 sequence. To assess the frequency of these two new repeat conformations in the general  
38 population we screened 163 healthy individuals. These novel motifs were more frequent in  
39 patients versus controls. While we cannot be certain that the homozygous genotypes of the novel  
40 expanded conformations are pathogenic, their occurrence should nonetheless be taken into  
41 consideration in future studies.

42 Autosomal recessive cerebellar ataxias are a heterogenous group of neurodegenerative diseases.  
43 Each type has distinct clinical characteristics, but the key symptom is progressive cerebellar  
44 dysfunction typically with gait and balance problems, dysarthria, dysmetria and oculomotor  
45 abnormalities. Other neurological dysfunction and/or non-neurologic phenotypes are also  
46 observed in some cases [1]. The most studied recessive ataxia is Friedreich's ataxia (FRDA)  
47 which has the highest prevalence, followed by autosomal recessive spastic ataxia of Charlevoix-  
48 Saguenay (ARSACS), ataxia with vitamin E deficiency, autosomal recessive cerebellar ataxia  
49 type 1 (ARCA-1) and type 2 (ARCA-2), and ataxia with oculomotor apraxia type 1 (AOA-1) and  
50 type 2 (AOA-2) [2].

51 Homozygous expansions of an AAGGG pentanucleotide repeat in the second intron of the *RFC1*  
52 gene (hg19/GRCh37, chr4:39,350,045-39,350,103) were identified as a frequent cause of late-  
53 onset recessive ataxia, explaining the more than 20 percent of Caucasian sporadic ataxia patients  
54 [3]. A total of four distinct intronic repeat conformations were identified with different  
55 sequences: AAAAG<sub>11</sub>, as the wild-type sequence, and longer expansions of AAAAG<sub>n</sub>, AAAGG<sub>n</sub>  
56 and AAGGG<sub>n</sub>. The configuration with the AAGGG pentanucleotide was shown to be the only  
57 disease-causing conformation of the expansion, ranging in size from 600 to 2,000 repeats.

58 *RFC1* represents a novel gene that could explain a significant number of adult-onset ataxia cases,  
59 the identification of cases in other populations may expand the clinical spectrum, provide  
60 example of variable regional prevalence and uncover repeat sequence differences. Therefore, we  
61 screened the *RFC1* expansion in Canadian and Brazilian ataxia patients.

62 Two cohorts consisting of adult-onset ataxia cases were used to estimate the prevalence of the  
63 *RFC1* expansions (Table 1). Cohort 1 and cohort 2 comprised Brazilian (n = 23) and Canadian  
64 (n = 26) adult-onset cases who did not carry variants in genes associated with common dominant  
65 and recessive ataxias (FRDA, DRPLA, SCA1, SCA2, SCA3, SCA6, SCA7, SCA10, SCA12,  
66 SCA17 and ARCA-1). Cohort 3 consisted of randomly selected adult-onset ataxia Canadian  
67 patients (n = 128). In addition, a cohort of 163 healthy Canadian control individuals was also  
68 examined to estimate the frequency of the novel sequence conformations that were observed for  
69 the *RFC1* repeat expansion. All subjects provided informed consent, and the study was approved  
70 by the appropriate institutional review boards.

71 Screening of the *RFC1* repeat expansion was performed on genomic DNA by RP-PCR as  
72 described in Cortese et al. [3]. RP-PCR products were separated on an ABI3730xl DNA  
73 Analyzer (Applied Biosystems®, McGill University and Genome Québec Innovation Centre)  
74 and results were visualized using GeneMapper® v.4.0 (Applied Biosystems®). The samples that  
75 were homozygous for the AAGGG repeat (according to the RP-PCR results) were subjected to  
76 long-range PCR (using the same primers as Cortese et al. [3]) and Sanger sequencing to examine  
77 the repeat sequence. Samples for which the allelic repeat combinations could not be determined  
78 by RP-PCR were subjected to a long-range PCR, the product of which was purified (QIAquick  
79 gel extraction kit, Qiagen). The Sanger sequencing results of these long-range PCR were  
80 analyzed using Unipro UGENE version 1.31 [4]. Finally, to test the association of the novel  
81 AAGAG variant with ataxia, we performed Fisher's exact test using Canadian cases and  
82 controls.

83 To examine the prevalence of *RFC1*-based adult-onset ataxia, we screened the repeat expansions  
84 in a Brazilian and two Canadian cohorts. Based on the RP-PCR results of the Brazilian cohort,  
85 we had a total of four candidate patients that appeared to be homozygous for the pathogenic  
86 AAGGG expansion. However, Sanger sequencing revealed that two of these candidates were  
87 actually homozygous for the AAAGG expansion. Although different sets of primers were used in  
88 the RP-PCR, it seems that the AAAGG expansions can sometimes mimic AAGGG, misleading  
89 the results.

90 We identified three patients in the three cohorts with a homozygous pathogenic AAGGG repeat  
91 expansion. Two of the patients were Brazilian siblings and the other one was Canadian (Figure  
92 1a and 1b respectively). Clinical features of the three patients with biallelic AAGGG expansions  
93 are summarized in Supplementary Table 1. The allele count and frequency of the different repeat  
94 expansions observed in all three cohorts are shown in Table 1.

95 Two new repeat expansion motifs were observed in our cohorts: AAGAG and AGAGG. The RP-  
96 PCR plots were characterized by a single peak, but the allele was longer than the wild type  
97 (Figure 1c and 1d). The novel motifs were in a heterozygous state in all 22 carrier individuals  
98 (Table 1). The average length of these novel expansions is 900 bp (180 repeats) (Supplementary  
99 Figure 1).

100 Additionally, we assessed the frequency of the AAGAG and AGAGG motifs in 163 healthy  
101 Canadian individuals using the same RP-PCR approach, followed again by long-range PCR and  
102 Sanger sequencing for samples where a novel expansion pattern was revealed by the RP-PCR.  
103 We detected a total of seven samples with a heterozygous AAGAG expansion confirmed by

104 Sanger sequencing for an allele frequency of 2%. The frequency of the novel motif expansion  
105 was found to be approximately five times higher in cases than controls (Fisher's exact test  
106  $p = 2.95 \times 10^{-4}$ , OR = 5.10, 95% CI = 1.93 – 15.16).

107 This study provides a detailed examination of the *RFC1* repeat region in Canadian and Brazilian  
108 cohorts with adult-onset ataxia. Two novel repeat motifs were identified. In addition to the  
109 cohorts in which known ataxia genes were ruled out, we used a Canadian cohort of adult-onset  
110 ataxia cases, without prior genetic testing, to estimate the frequency of *RFC1* pentanucleotide  
111 repeat motifs in this population. In contrast with the previous study where the *RFC1* AAGGG  
112 expansion explained a large proportion of familial and sporadic ataxia cases [3], the overall  
113 frequency of that *RFC1* repeat expansion mutation was very low in both our Canadian and  
114 Brazilian cohorts. The low prevalence of the *RFC1* pathogenic expansion, as well as  
115 identification of novel motifs might be due to the different genetic backgrounds of the Canadian  
116 and Brazilian populations [5]. Therefore, additional populations should be tested for the same  
117 pathogenic repeat, in order to draw a clear conclusion on its frequency in adult-onset ataxia.

118 The frequency of allelic configurations has been described only in healthy controls before [3].  
119 This is the first study to assess the frequency of all possible configurations in a cohort of patients.  
120 In the previous study [3], a total of 3 % of the variants were not identified in the *RFC1* repeat  
121 loci in healthy cohort, and the existence of other possible allelic configurations was suggested.  
122 Our study identified novel repeat motifs in the *RFC1*, with a frequency of 0.07 and 0.02 in  
123 Canadian cases and controls respectively. The higher frequency of the novel AAGAG repeat unit  
124 in cases compared to controls suggests that it may also be associated with adult-onset ataxia.

125 Further studies are warranted to confirm the structure and sequence of the repeated region, and to  
126 investigate potential biological impacts.

127 The presence of pathogenic or nonpathogenic repeat sequences in either disease-associated or  
128 wild type alleles has been observed across several expansion-associated diseases such as SCA37  
129 [6,7], SCA10 [8] and FRDA [9]. Variations interrupting the pure repeat sequences of disease-  
130 causing alleles can affect their penetrance, as well as the age at onset and severity of the  
131 conditions associated with specific repeats. Whereas interruptions in the normal alleles prevent  
132 the pathogenic expansions and provide the stability of repeats in disease-causing alleles. We did  
133 not observe the new sequence motifs along with a pathogenic AAGGG expansion in any of the  
134 patients, therefore further studies will be required to determine whether they affect the size of the  
135 pathogenic allele or the disease severity.

136 In conclusion, given the dynamic nature of the *RFC1* repeat, multiple validations of sequences  
137 and repeats length should be performed. To prevent false positive results, the RP-PCR plots  
138 should be interpreted with caution, and each AAGGG-positive sample should be validated by  
139 Sanger sequencing to confirm its true sequence. Additional work is needed to determine the  
140 frequency of other pentanucleotide repeat conformations and their association to adult-onset  
141 ataxia.

## 142 **Acknowledgements**

143 We would like to thank the participants of the study. We thank Vessela Zaharieva and H  l  ne  
144 Catoire, for their assistance. Fulya Ak  imen is supported by a Healthy Brains and Healthy Lives

145 (HBHL) graduate student fellowship. GAR holds a Canada Research Chair and is funded by the  
146 CIHR.

147 **References**

148 1- Synofzik, M., Puccio, H., Mochel, F., and Schöls, L. (2019). Autosomal Recessive Cerebellar  
149 Ataxias: Paving the way toward targeted molecular therapies. *Neuron*. *101*,5 60-583.

150 2- Noreau, A., Dupre, N., Bouchard, J.P., Dion, P.A., Rouleau, G.A. (2013). Autosomal  
151 recessive cerebellar ataxias. In *Handbook of the cerebellum and cerebellar disorders*, M. Manto,  
152 D.L. Gruol, J. D. Schmahmann, N. Koibuchi, F. Rossi, eds. (New York: Springer  
153 Science+Business Media), pp. 2177-2191.

154 3- Cortese, A., Simone, R., Sullivan, R., Vandrovцова, J., Tariq, H., Yau, W., et al. (2019).  
155 Expansion of a recessive intronic AAGGG repeat in the *RFC1* gene is a common cause of late-  
156 onset ataxia. *Nat Genet*. *51*, 649–658.

157 4- Okonechnikov, K., Golosova, O., Fursov, M., and the UGENE team. (2012). Unipro UGENE:  
158 a unified bioinformatics toolkit. *Bioinformatics*. *28*, 1166–1167.

159 5- Dupré, N., Bouchard, J.P., Brais, B., and Rouleau, G.A. (2006). Hereditary ataxia, spastic  
160 paraparesis and neuropathy in the French-Canadian population. *Can. J. Neurol. Sci.* *33*, 149-157.

161 6- Seixas, A.I., Loureiro, J.R., Costa, C., Ordóñez-Ugalde, A., Marcelino, H., Oliveira, C.L., et  
162 al. (2017). A pentanucleotide ATTC repeat insertion in the non-coding region of *DAB1*,  
163 mapping to *SCA37*, causes spinocerebellar ataxia. *Am. J. Hum. Genet.* *101*, 87-103.



- 164 7- Loureiro, J.R., Oliveira, C.L., Mota, C., Castro, A.F., Costa, C., Loureiro, J.L. et al. (2019).  
 165 Mutational mechanism for DAB1 (ATTTC)<sub>n</sub> insertion in SCA37: ATTTT repeat lengthening  
 166 and nucleotide substitution. *Hum Mutat.* 40, 1-9.
- 167 8- Matsuura, T., Fang, P., Pearson, C.E., Jayakar, P., Ashizawa, T., Roa, B.B. et al. (2006).  
 168 Interruptions in the expanded ATTCT repeat of spinocerebellar ataxia type 10: repeat purity as a  
 169 disease modifier? *Am. J. Hum. Genet.* 78, 125–129.
- 170 9- Al-Mahdawi, S., Ging, H., Bayot, A., Cavalcanti, F., La Cognata, V., Cavallaro, S. et al.  
 171 (2018). Large interruptions of GAA repeat expansion mutations in Friedreich Ataxia are very  
 172 rare. *Front. Cell. Neurosci.* 12, 443.

173 Table 1. Allele frequency of *RFC1* repeat expansions in Brazilian and Canadian ataxia cohorts

|                                                | Cohort 1<br>n = 23 | Cohort 2<br>n = 128 | Cohort 3<br>n = 26 |
|------------------------------------------------|--------------------|---------------------|--------------------|
| Mean age at onset                              | 37 ± 7             | 50 ± 13             | 57 ± 10            |
| Prior genetic testing for other common ataxias | +                  | -                   | +                  |
| AAAAG <sub>11</sub>                            | 29 (63%)           | 193 (75.4%)         | 36 (69.2%)         |
| AAAAG <sub>n</sub>                             | 6 (13%)            | 20 (7.8%)           | 1 (1.9 %)          |
| AAAGG <sub>n</sub>                             | 3 (6.5%)           | 8 (3.1%)            | 3 (5.8%)           |
| AAGGG <sub>n</sub>                             | 5 (10.9%)          | 16 (6.2%)           | 11 (21.1%)         |
| AAGAG <sub>n</sub>                             | 2 (4.3%)           | 18 (7%)             | 1 (1.9%)           |
| AGGAG <sub>n</sub>                             | 1 (2.2%)           | 1 (0.4%)            |                    |

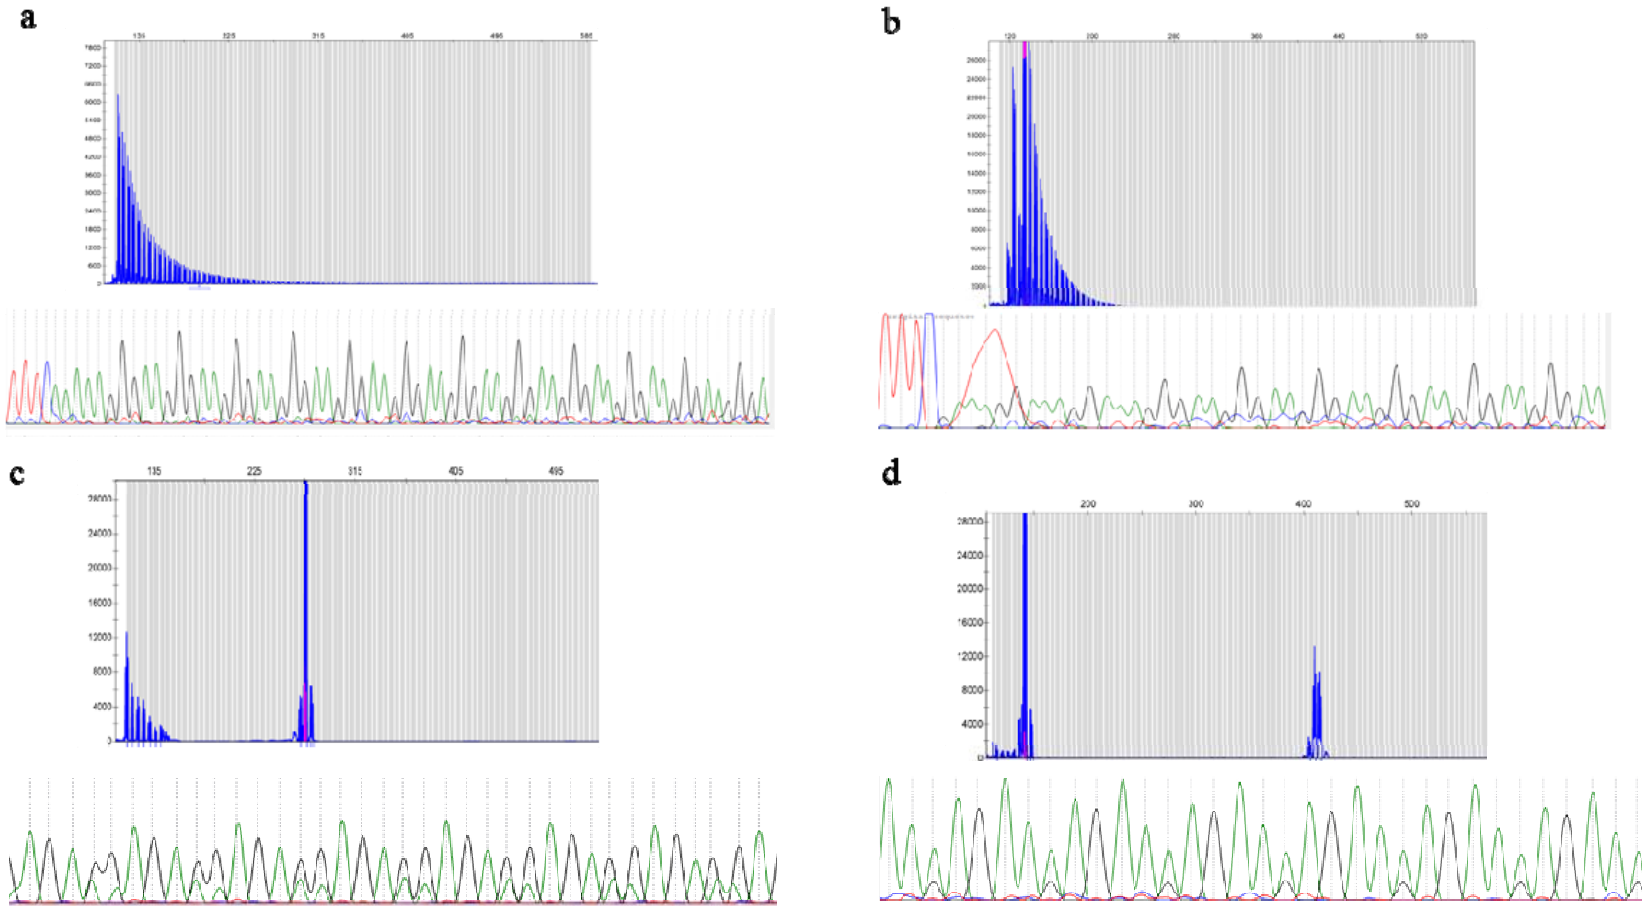

175

176 **Figure 1.** Repeat-primed PCR reactions targeting the AAGGG repeated motif. Fragment plots and Sanger chromatograms of long-  
 177 range PCR results are shown for AAGGG-homozygous Canadian (1a) and Brazilian (1b) patients. Novel AGGAG (1c) and AAGAG  
 178 (1d) expansion motifs (heterozygous) required both methods for identification.
